# Supplementary figures and images for: Simultaneous Measurement of Tricarboxylic Acid Cycle Intermediates in Different Biological Matrices Using Liquid Chromatography–Tandem Mass Spectrometry; Quantitation and Comparison of TCA Cycle Intermediates in Human Serum, Plasma, Kasumi-1 Cell and Murine Liver Tissue
Source: MDPI journal article supplement (doi:10.3390/metabo10030103), 2020-03-12

# TCA intermediate individual chromatogram

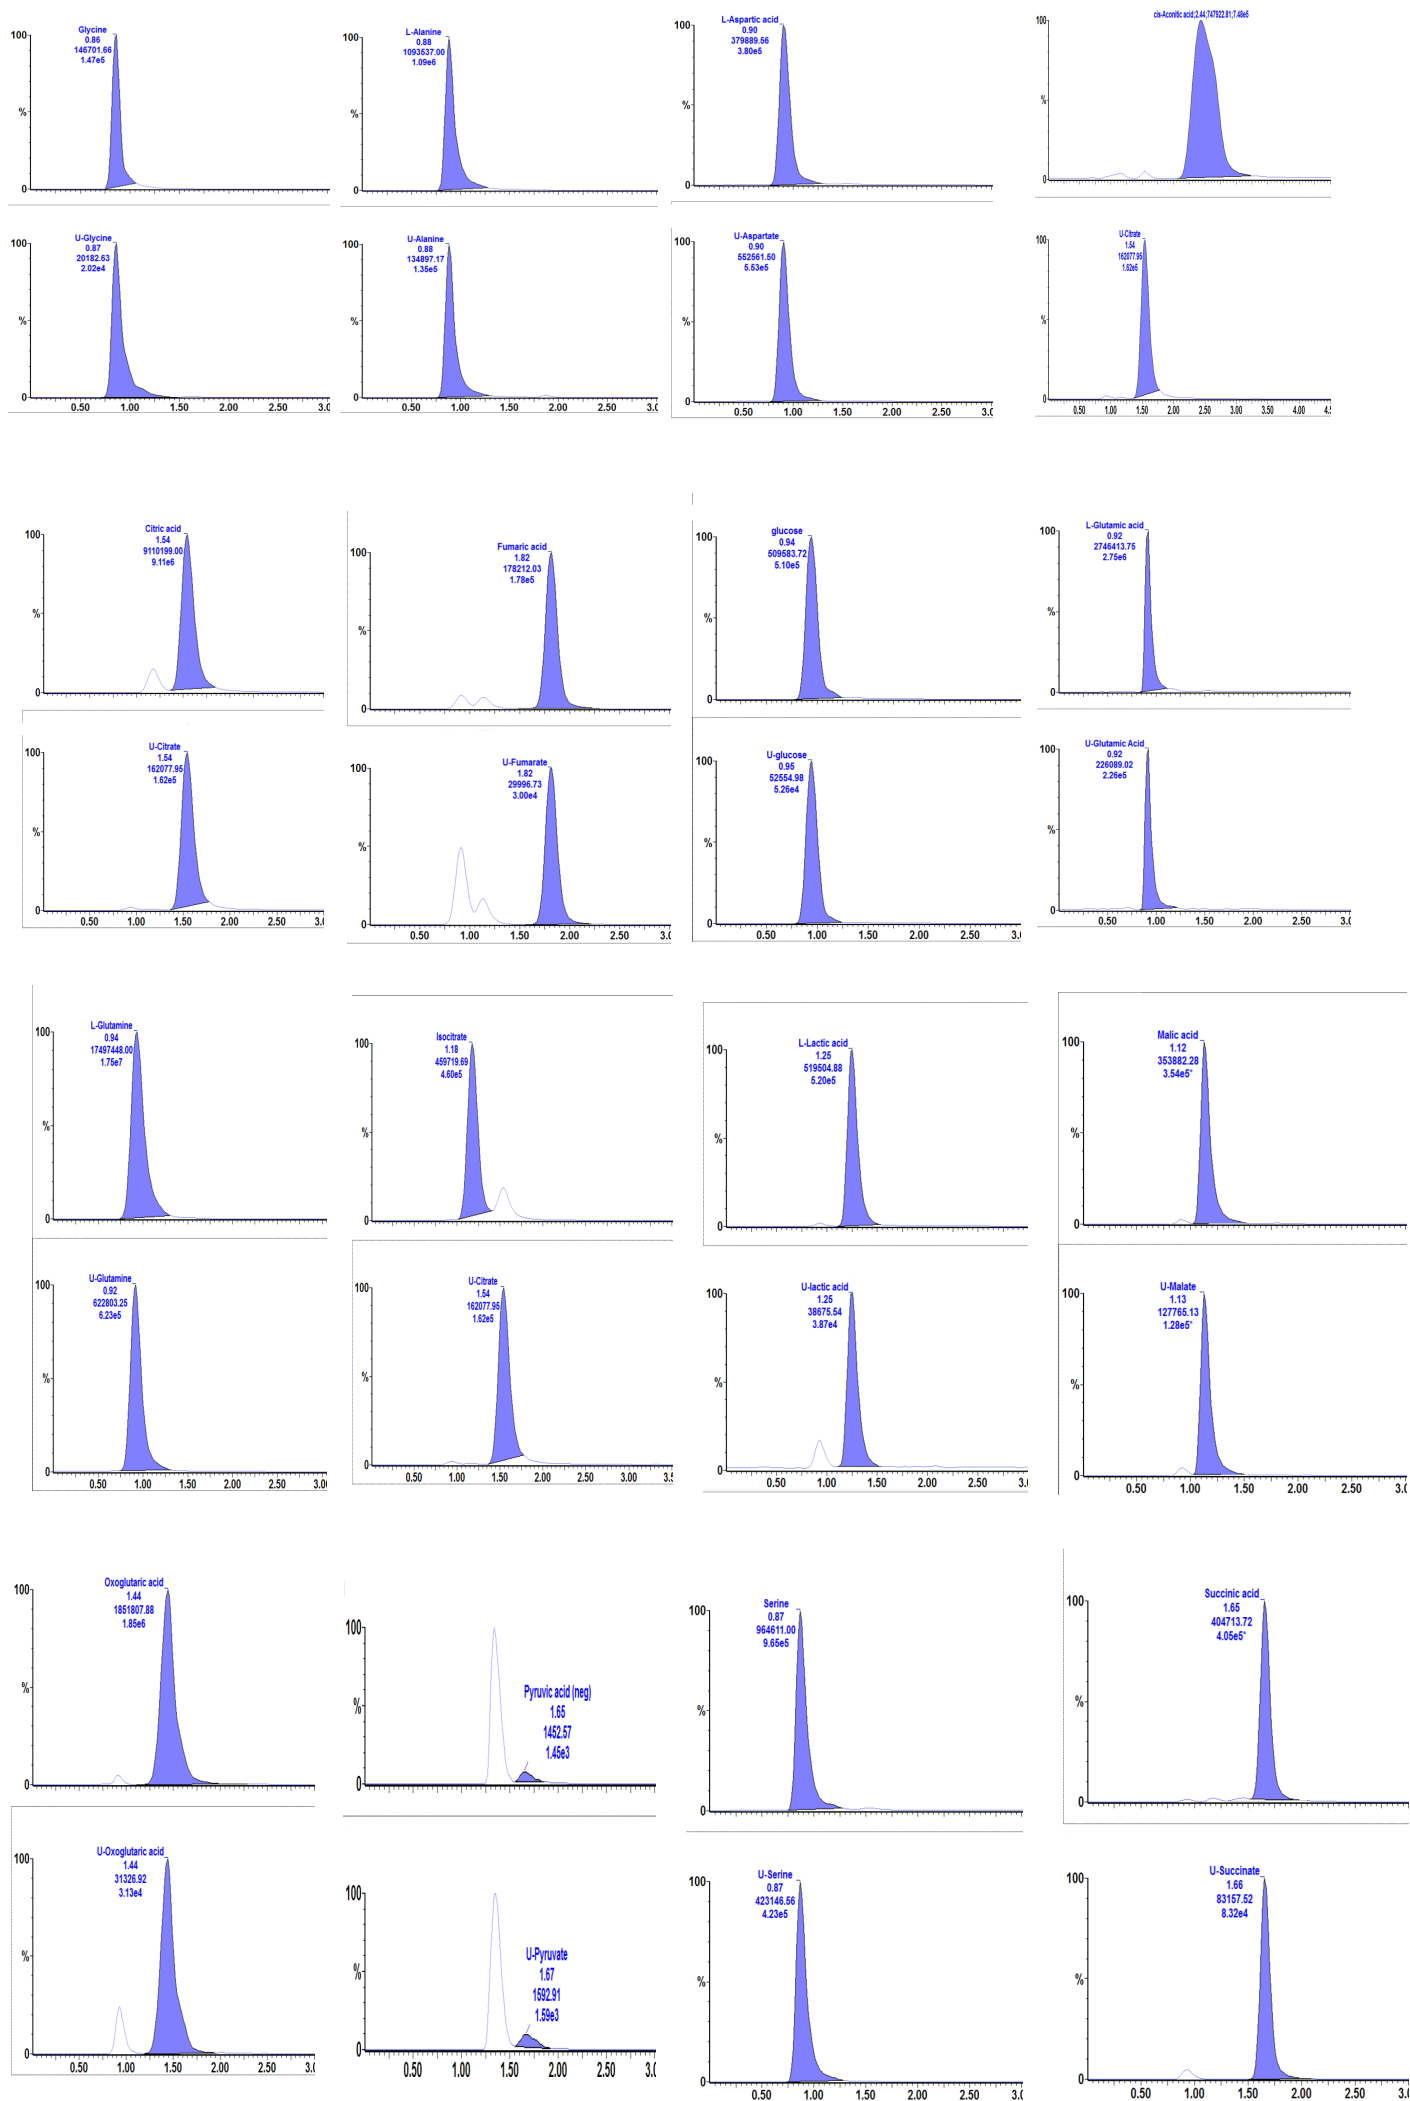

Supplement: s1 [file s1]
